# Supplementary material for: Solvent-mediated assembly of chiral/achiral hydrophilic Ca(ii)-tetrafluoroterephthalate coordination frameworks: 3D chiral water aggregation, structural transformation and selective CO2 adsorption
Source: Royal Society of Chemistry journal article supplement (doi:10.1039/c4ce01019a), 2014-01-01
Supplement: c4ce01019a1.pdf [file c4ce01019a1.pdf]

*Electronic Supplementary Information*

**Solvent-mediated assembly of chiral/achiral hydrophilic Ca(II)–  
tetrafluoroterephthalate coordination frameworks: 3D chiral water  
aggregation, structural transformation and selective CO<sub>2</sub> adsorption**

Sheng-Chun Chen,<sup>ab</sup> Feng Tian,<sup>a</sup> Kun-Lin Huang,<sup>\*c</sup> Cheng-Peng Li,<sup>d</sup> Jing Zhong,<sup>a</sup> Ming-Yang  
He,<sup>ab</sup> Zhi-Hui Zhang,<sup>a</sup> Hong-Ning Wang,<sup>a</sup> Miao Du<sup>\*d</sup> and Qun Chen<sup>\*ab</sup>

<sup>a</sup> *School of Petrochemical Engineering, Jiangsu Key Laboratory of Advanced Catalytic  
Materials and Technology, Changzhou University, Changzhou 213164, P. R. China. E-mail:  
chenqunjpu@yahoo.com*

<sup>b</sup> *School of Chemical Engineering, Nanjing University of Science & Technology, Nanjing  
210094, P. R. China.*

<sup>c</sup> *College of Chemistry, Chongqing Normal University, Chongqing 401331, P. R. China. E-mail:  
kunlin@cqnu.edu.cn*

<sup>d</sup> *College of Chemistry, Tianjin Key Laboratory of Structure and Performance for Functional  
Molecules, Tianjin Normal University, Tianjin 300387, P. R. China. E-mail:  
dumiao@public.tpt.tj.cn*

**Table S1.** The selected bond distances (Å) and angles (deg) for complexes **1–3**<sup>a</sup>

| Complex <b>1</b> |           |               |           |               |           |
|------------------|-----------|---------------|-----------|---------------|-----------|
| Ca1–O1           | 2.335(3)  | Ca1–O1#2      | 2.335(3)  | Ca1–O2        | 2.556(3)  |
| Ca1–O2#2         | 2.556(3)  | Ca1–O2#3      | 2.419(3)  | Ca1–O2#4      | 2.419(3)  |
| Ca1–O1WB         | 2.280(1)  |               |           |               |           |
| O1–Ca1–O1 WB     | 106.4(7)  | O1WB–Ca1–O1#2 | 92.5(6)   | O1WB–Ca1–O2   | 142.2(6)  |
| O1WB–Ca1–O2#2    | 161.1(9)  | O1WB–Ca1–O2#3 | 92.5(7)   | O1WB–Ca1–O2#4 | 74.4(7)   |
| O1–Ca1–O1#2      | 160.9(1)  | O1–Ca1–O2     | 80.73(9)  | O1–Ca1–O2#2   | 82.04(9)  |
| O1–Ca1–O2#3      | 81.22(9)  | O1–Ca1–O2#4   | 101.00(9) | O2–Ca1–O2#2   | 50.8(1)   |
| O2–Ca1–O2#3      | 121.39(8) | O2–Ca1–O2#4   | 71.8(1)   | O2#3–Ca1–O2#4 | 166.8(2)  |
| Complex <b>2</b> |           |               |           |               |           |
| Ca1–O1           | 2.457(4)  | Ca1–O1#2      | 2.457(4)  | Ca1–O2#1      | 2.745(4)  |
| Ca1–O3           | 2.377(4)  | Ca1–O3#2      | 2.377(4)  | Ca1–O3#3      | 2.338(5)  |
| O1–Ca1–O1#2      | 80.2(1)   | O1–Ca1–O2#1   | 123.3(1)  | O1–Ca1–O2#3   | 82.1(1)   |
| O1–Ca1–O3        | 87.1(1)   | O1–Ca1–O3#2   | 146.6(1)  | O2#1–Ca1–O2#3 | 148.9(1)  |
| O2#1–Ca1–O3      | 79.4(1)   | O2#1–Ca1–O3#2 | 84.8(1)   | O3–Ca1–O3#2   | 118.3(1)  |
| Complex <b>3</b> |           |               |           |               |           |
| Ca1–O1           | 2.599(1)  | Ca1–O1#1      | 2.599(1)  | Ca1–O3        | 2.431(2)  |
| Ca1–O4           | 2.60(1)   | Ca1–O4#1      | 2.59(1)   | Ca1–O4#2      | 2.557(1)  |
| Ca1–O4#4         | 2.557(1)  | Ca1–O5        | 2.449(2)  | Ca1–O5#3      | 2.468(1)  |
| O1–Ca1–O1#1      | 123.38(6) | O1–Ca1–O3     | 118.27(2) | O1–Ca1–O4     | 67.75(4)  |
| O1–Ca1–O4#1      | 133.73(5) | O1–Ca1–O4#2   | 133.05(5) | O1–Ca1–O4#4   | 66.34(4)  |
| O1–Ca1–O5        | 71.45(4)  | O1–Ca1–O5#3   | 72.70(3)  | O3–Ca1–O4     | 72.80(5)  |
| O3–Ca1–O4#2      | 70.72(5)  | O3–Ca1–O5     | 129.46(6) | O3–Ca1–O5#3   | 131.49(6) |
| O4–Ca1–O4#1      | 74.83(6)  | O4–Ca1–O4#2   | 143.50(6) | O4–Ca1–O4#4   | 93.20(5)  |
| O4–Ca1–O5        | 139.21(3) | O4–Ca1–O5#3   | 69.13(5)  | O4#2–Ca1–O4#4 | 76.00(6)  |
| O4#4–Ca1–O5      | 69.97(5)  | O5–Ca1–O5#3   | 99.05(7)  |               |           |

<sup>a</sup> Symmetry transformations used to generate equivalent atoms: For **1**, #2:  $x, y, -z + 2$ ; #3:  $-x + 1, -y + 1, z + 1/2$ ; #4:  $-x + 1, -y + 1, -z + 3/2$ ; For **2**, #1:  $-x + 1, -y + 1, -z$ ; #2:  $-x + 1, y, -z + 1/2$ ; #3:  $x, -y + 1, z + 1/2$ ; For **3**, #1:  $x, -y + 3/2, z$ ; #2:  $x + 1, -y + 3/2, z$ ; #3:  $x - 1, y, z$ ; #4:  $x + 1, y, z$ .

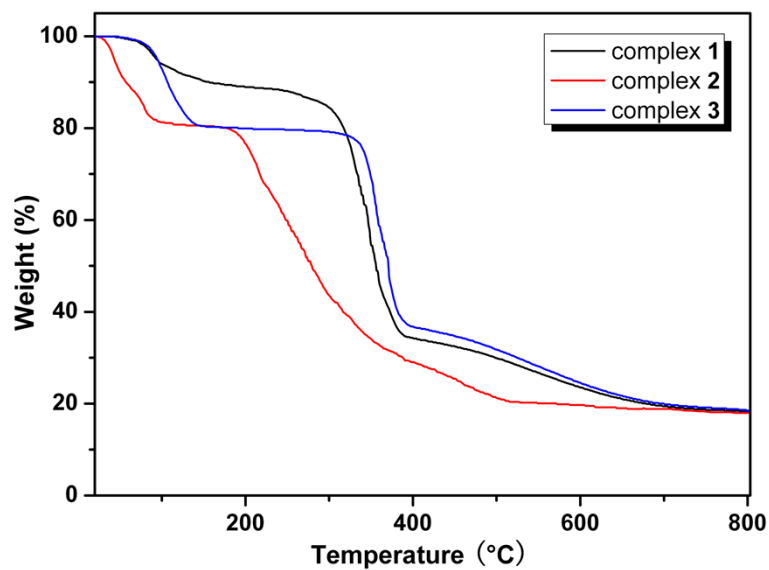

**Fig. S1** TGA curves of complexes 1–3.

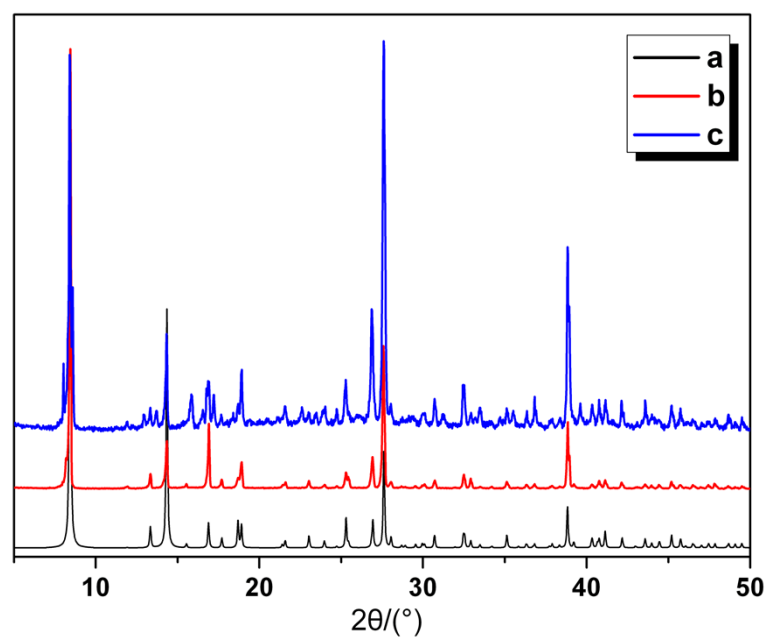

**Fig. S2** XRPD patterns for: (a) **1** as simulated from the single-crystal data; (b) as-synthesized **1**; and (c) prepared by dehydrating **1** at 160 °C for 6 h.

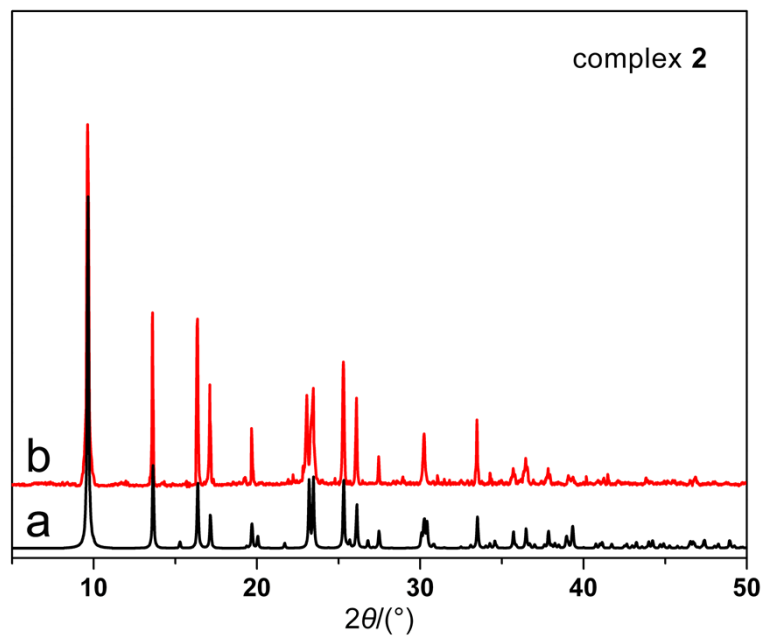

**Fig. S3** XRPD patterns for: (a) **2** as simulated from the single-crystal data; (b) as-synthesized **2**.

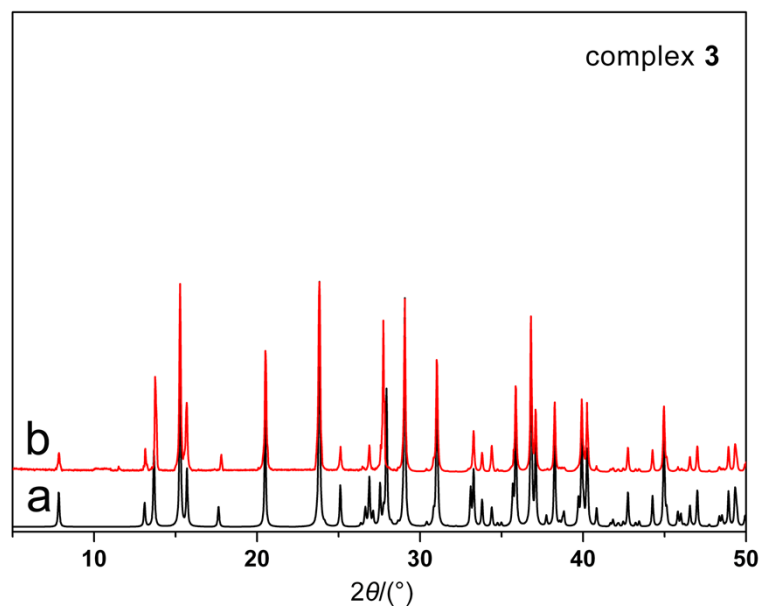

**Fig. S4** XRPD patterns for: (a) **3** as simulated from the single-crystal data; (b) as-synthesized **3**.
